# Supplementary material for: Characterization of an Artificial Swine-Origin Influenza Virus with the Same Gene Combination as H1N1/2009 Virus: A Genesis Clue of Pandemic Strain
Source: PubMed Central journal article supplement (PMC3143117; doi:10.1371/journal.pone.0022091), 2011-07-25
Supplement: pone.0022091.s002.pdf [file pone.0022091.s002.pdf]

Table S1. Amino acid differences of the NS1 proteins between rH1N1 and pBJ09 viruses

| Virus | Amino acid position in NS1 |    |    |    |     |     |     |     |     |     |     |     |     |     |     |     |     |     |     |     |
|-------|----------------------------|----|----|----|-----|-----|-----|-----|-----|-----|-----|-----|-----|-----|-----|-----|-----|-----|-----|-----|
|       | 7                          | 78 | 91 | 93 | 114 | 118 | 123 | 129 | 137 | 139 | 145 | 153 | 171 | 172 | 197 | 198 | 206 | 207 | 209 | 211 |
| rH1N1 | V                          | K  | A  | M  | S   | M   | I   | I   | T   | D   | V   | G   | D   | I   | I   | L   | R   | N   | D   | R   |
| pBJ09 | M                          | R  | S  | I  | P   | L   | V   | V   | I   | N   | I   | E   | Y   | V   | N   | I   | C   | D   | N   | K   |
