# Supplementary material for: Characterization of an Artificial Swine-Origin Influenza Virus with the Same Gene Combination as H1N1/2009 Virus: A Genesis Clue of Pandemic Strain
Source: PubMed Central journal article supplement (PMC3143117; doi:10.1371/journal.pone.0022091), 2011-07-25
Supplement: pone.0022091.s003.pdf [file pone.0022091.s003.pdf]

Table S2. Amino acid differences of the NS2 proteins between rH1N1 and pBJ09 viruses

| Virus | Amino acid position in NS2 |    |    |    |    |    |    |     |
|-------|----------------------------|----|----|----|----|----|----|-----|
|       | 6                          | 40 | 52 | 54 | 80 | 83 | 92 | 115 |
| rH1N1 | M                          | F  | T  | D  | T  | V  | S  | T   |
| pBJ09 | V                          | I  | M  | N  | I  | M  | N  | A   |
